# Supplementary material
Source: publisher figshare collection journal article supplement (https://acs.figshare.com/ndownloader/files/16353164)
Supplement: Supplementary file 1 [file 16353164]

## Supporting Information

### Transition Metal Ion-Based Nanocrystalline Luminescent Thermometry in $\text{SrTiO}_3:\text{Ni}^{2+}$ , $\text{Er}^{3+}$ Nanocrystals Operating in the Second Optical Window of Biological Tissue

C. Matuszewska, K. Elzbieciak – Piecka, L. Marciniak\*

<sup>1</sup>Institute of Low Temperature and Structure Research, Polish Academy of Sciences, Okólna 2, 50-422 Wrocław, Poland

\* corresponding author: [L.marciniak@intibs.pl](mailto:L.marciniak@intibs.pl)

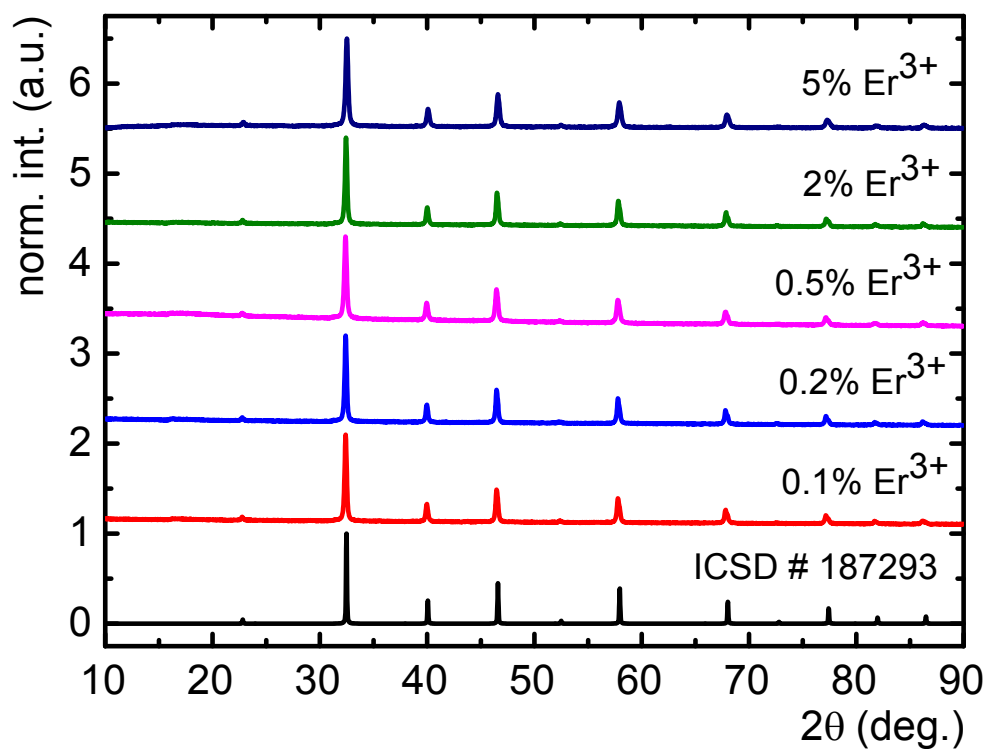

Figure S1. X – ray diffraction patterns of  $\text{SrTiO}_3:\text{Ni}^{2+}$ ,  $\text{Er}^{3+}$  nanocrystals for different  $\text{Er}^{3+}$  ions concentration.

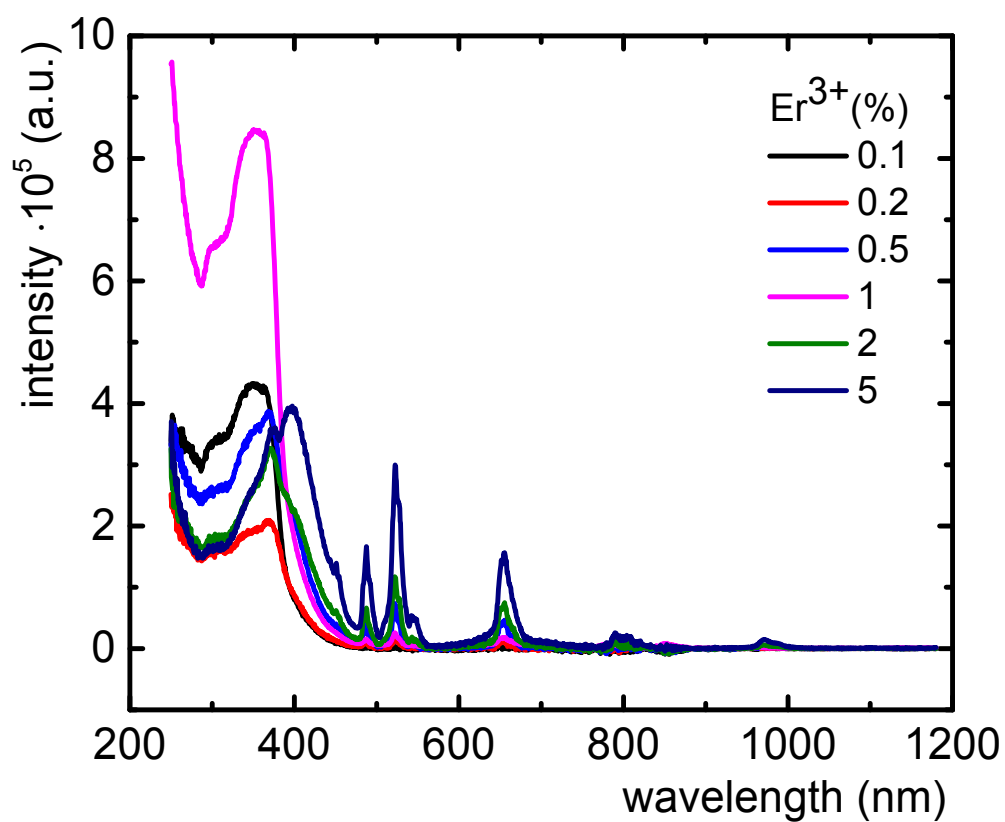

Figure S2. Excitation spectra of SrTiO<sub>3</sub>:Ni<sup>2+</sup>, Er<sup>3+</sup> nanocrystals for different Er<sup>3+</sup> ions concentration measured at  $\lambda_{\text{em}}=1545\text{nm}$ .

### Activation energy calculations

We obtained the value of activation energy from the equation:

$$I_{em} = \frac{I_0}{1 + \exp(-\frac{\Delta E_a}{kT})}$$

Where:  $I_0$  – maximum emission intensity

$I_{em}$  – emission intensity obtained from measurements

$\Delta E_a$  – activation energy

$k$  – Boltzmann constant

$T$  – temperature [K]

The integral emission intensity obtained from measurements was converted to the form of  $\ln(I_0/I_{em} - 1)$  and presented in the function of  $1/T$ . Subsequently, the declining part of this characteristic was approximated by a linear function  $y = ax + b$ , where slope  $a$  equaled  $\Delta E_a/k$ .

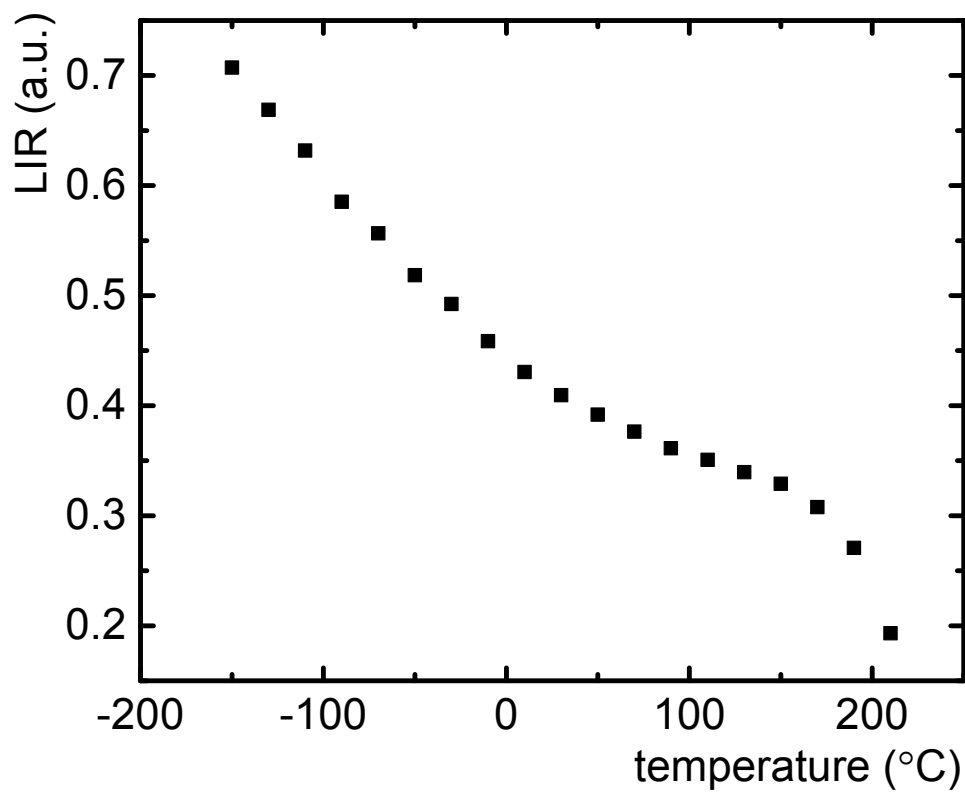

Figure S3. LIR as a function of temperature for SrTiO<sub>3</sub>: 0.1% Ni<sup>2+</sup>, where LIR was defined as:

$$LIR = \frac{\int I(1100 - 1250nm)}{\int (1250 - 1400nm)}$$

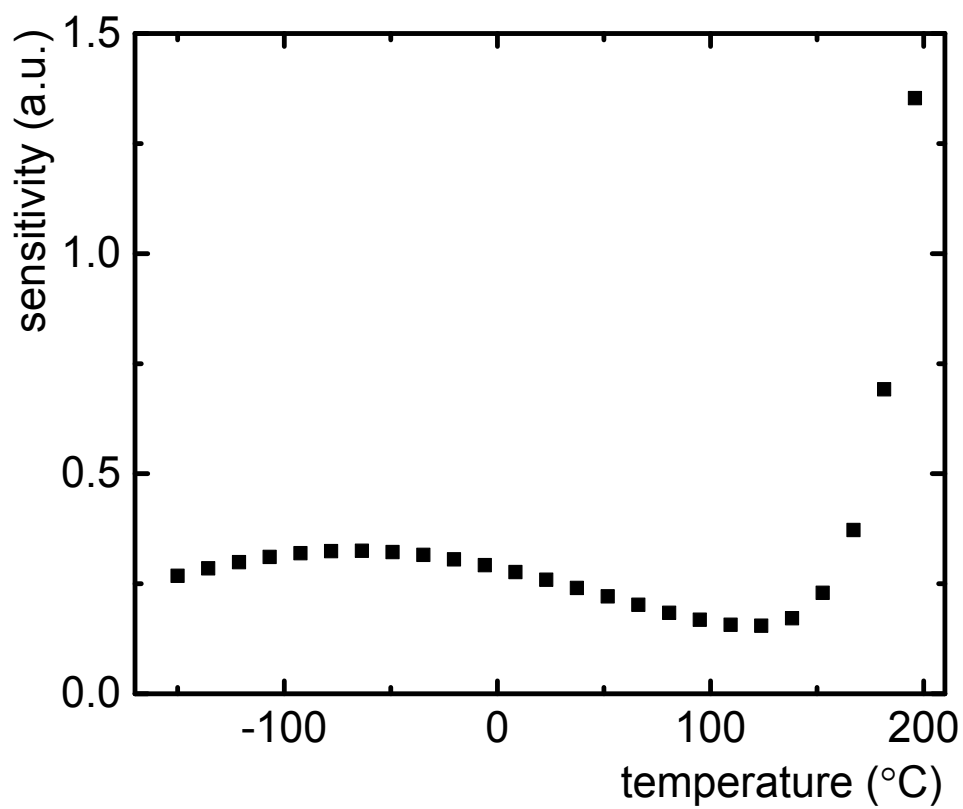

Figure S4. Relative sensitivity as a function of temperature for  $\text{SrTiO}_3: 0.1\% \text{Ni}^{2+}$ , where LIR was defined as:

$$LIR = \frac{\int I(1100 - 1250nm)}{\int (1250 - 1400nm)}$$

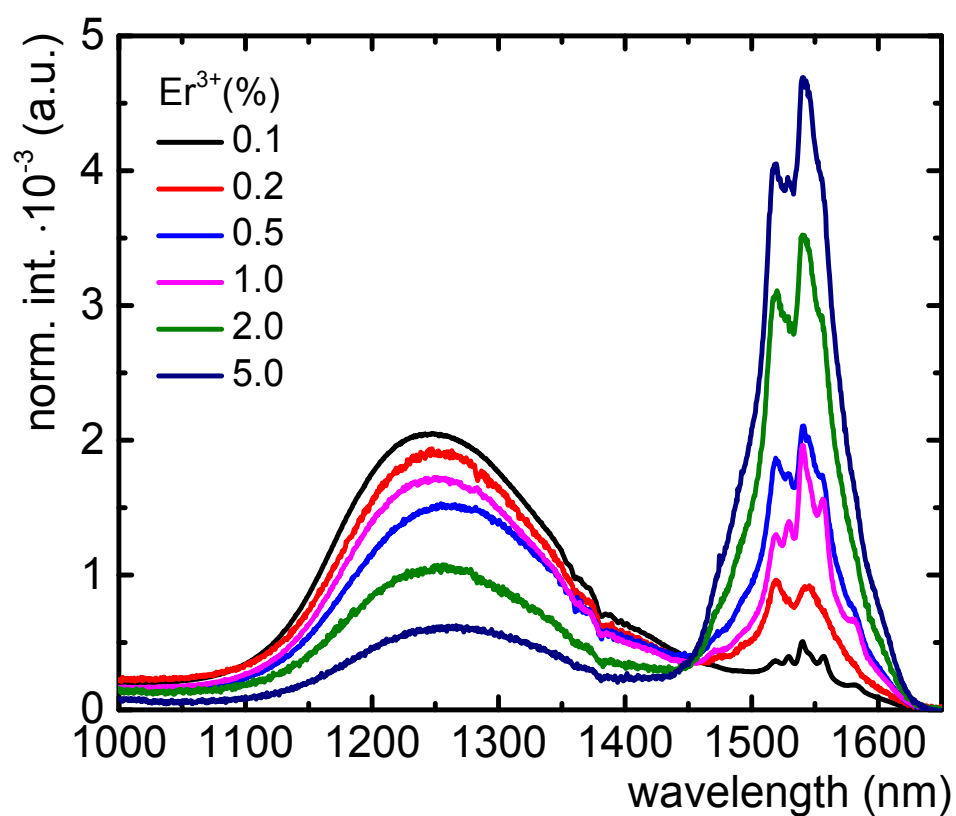

Figure S5. Emission spectra of  $\text{SrTiO}_3:\text{Ni}^{2+}, \text{Er}^{3+}$  nanocrystals for different  $\text{Er}^{3+}$  ions concentration upon  $\lambda_{\text{exc}}=375\text{nm}$ , normalized to the **total** integral intensity **of both emission bands**.

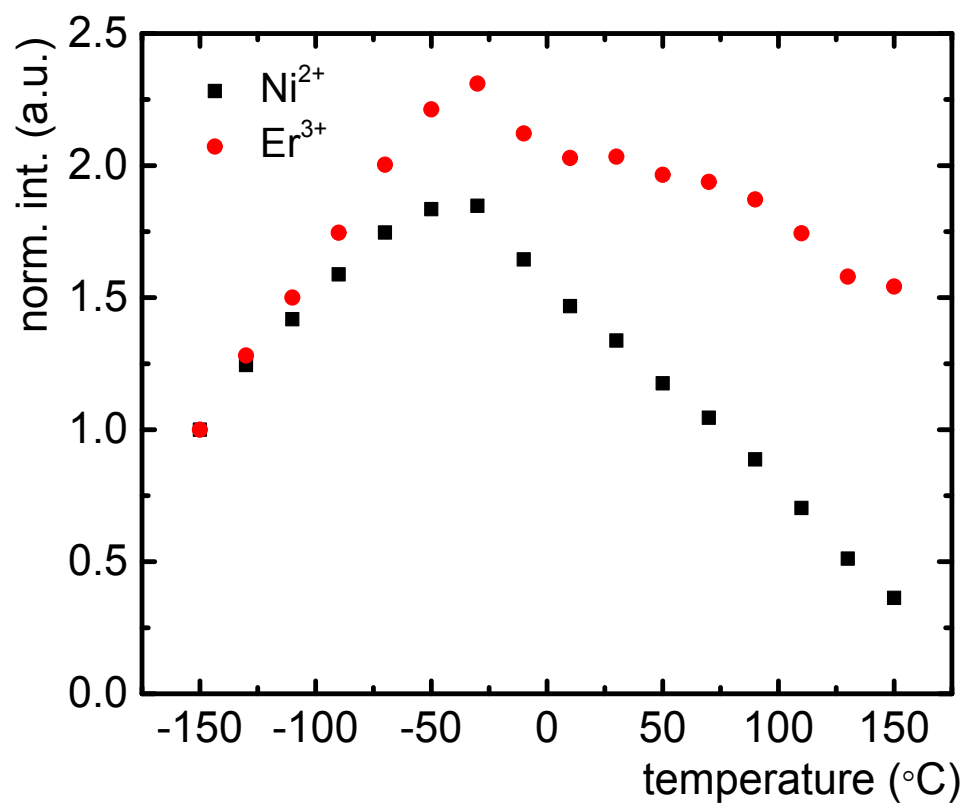

Figure S6. Comparison of integral intensity of Ni<sup>2+</sup> ions and Er<sup>3+</sup> ions for SrTiO<sub>3</sub>: 0.05% Ni<sup>2+</sup>, 0.1% Er<sup>3+</sup>, normalized to the first value.

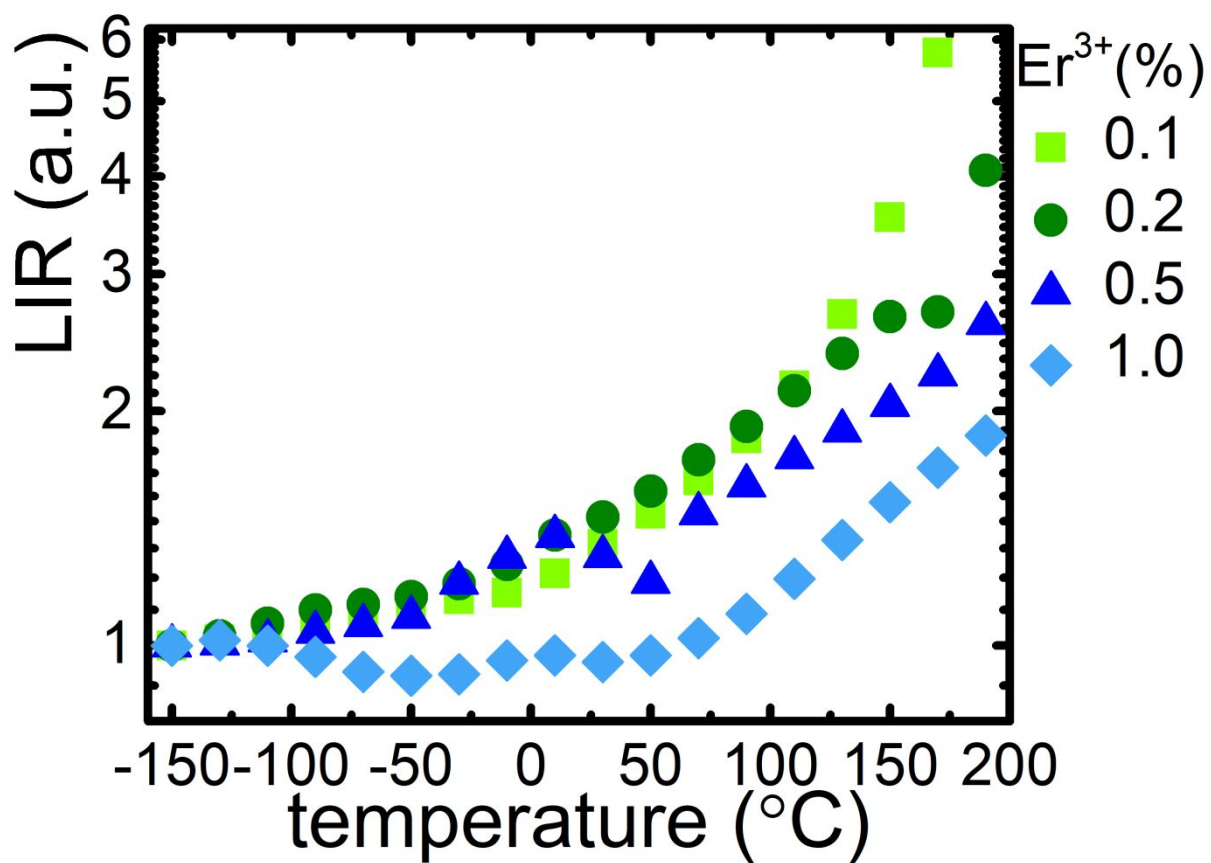

Figure S7. Normalized integral intensity of SrTiO<sub>3</sub>: 0.05%Ni<sup>2+</sup>, Er<sup>3+</sup> for different Er<sup>3+</sup> ions concentration calculated for the whole Ni<sup>2+</sup> emission band.



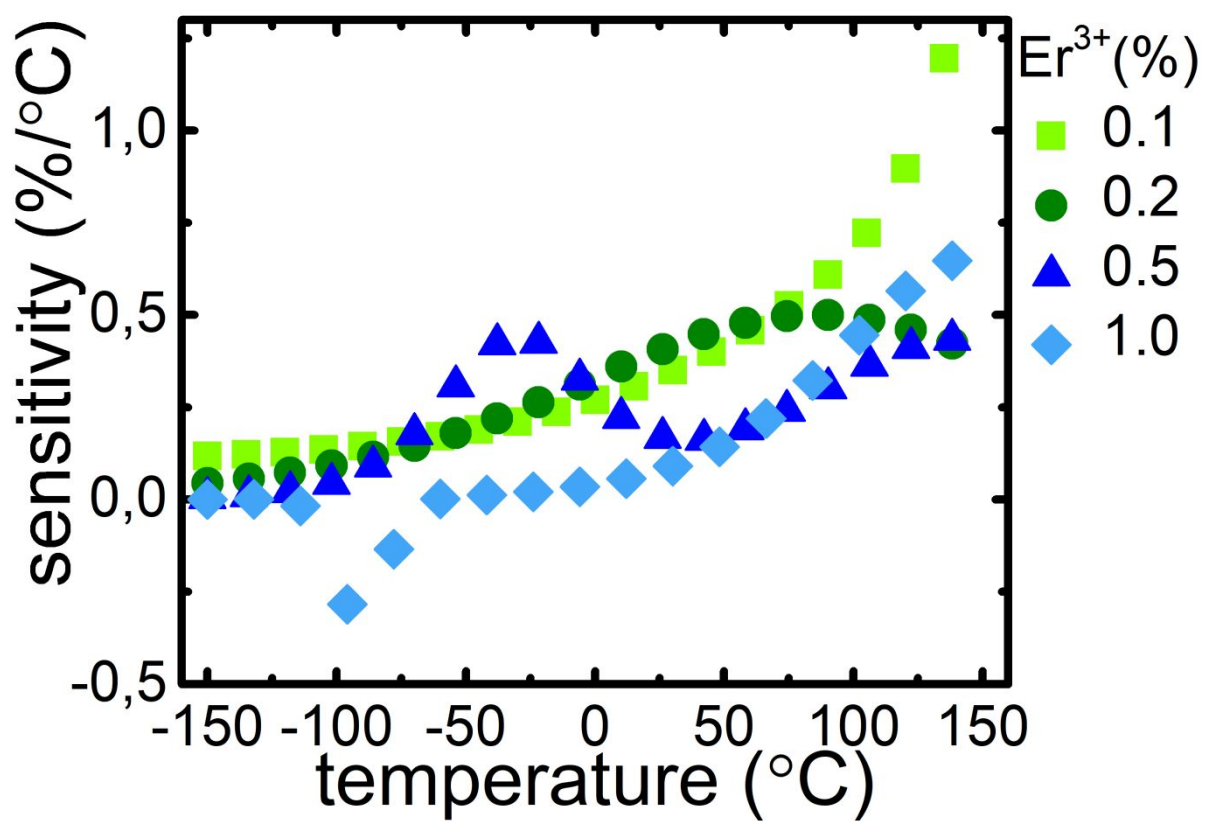

Figure S8. Relative sensitivity of  $\text{SrTiO}_3: 0.05\%\text{Ni}^{2+}, \text{Er}^{3+}$  for different  $\text{Er}^{3+}$  ions concentration calculated for the whole  $\text{Ni}^{2+}$  emission band.
